# Supplementary material
Source: publisher site journal article supplement (https://www.dovepress.com/article/592404)
Supplement: Supplementary file 1 [file 592404%20Supplemental%20Material.docx]

**Supplemental Figure 1:** Flow diagram of patient cohort selection, outlining the inclusion and exclusion criteria applied to the initial population. Number of patients excluded at each step and the reasons for the exclusions are indicated.


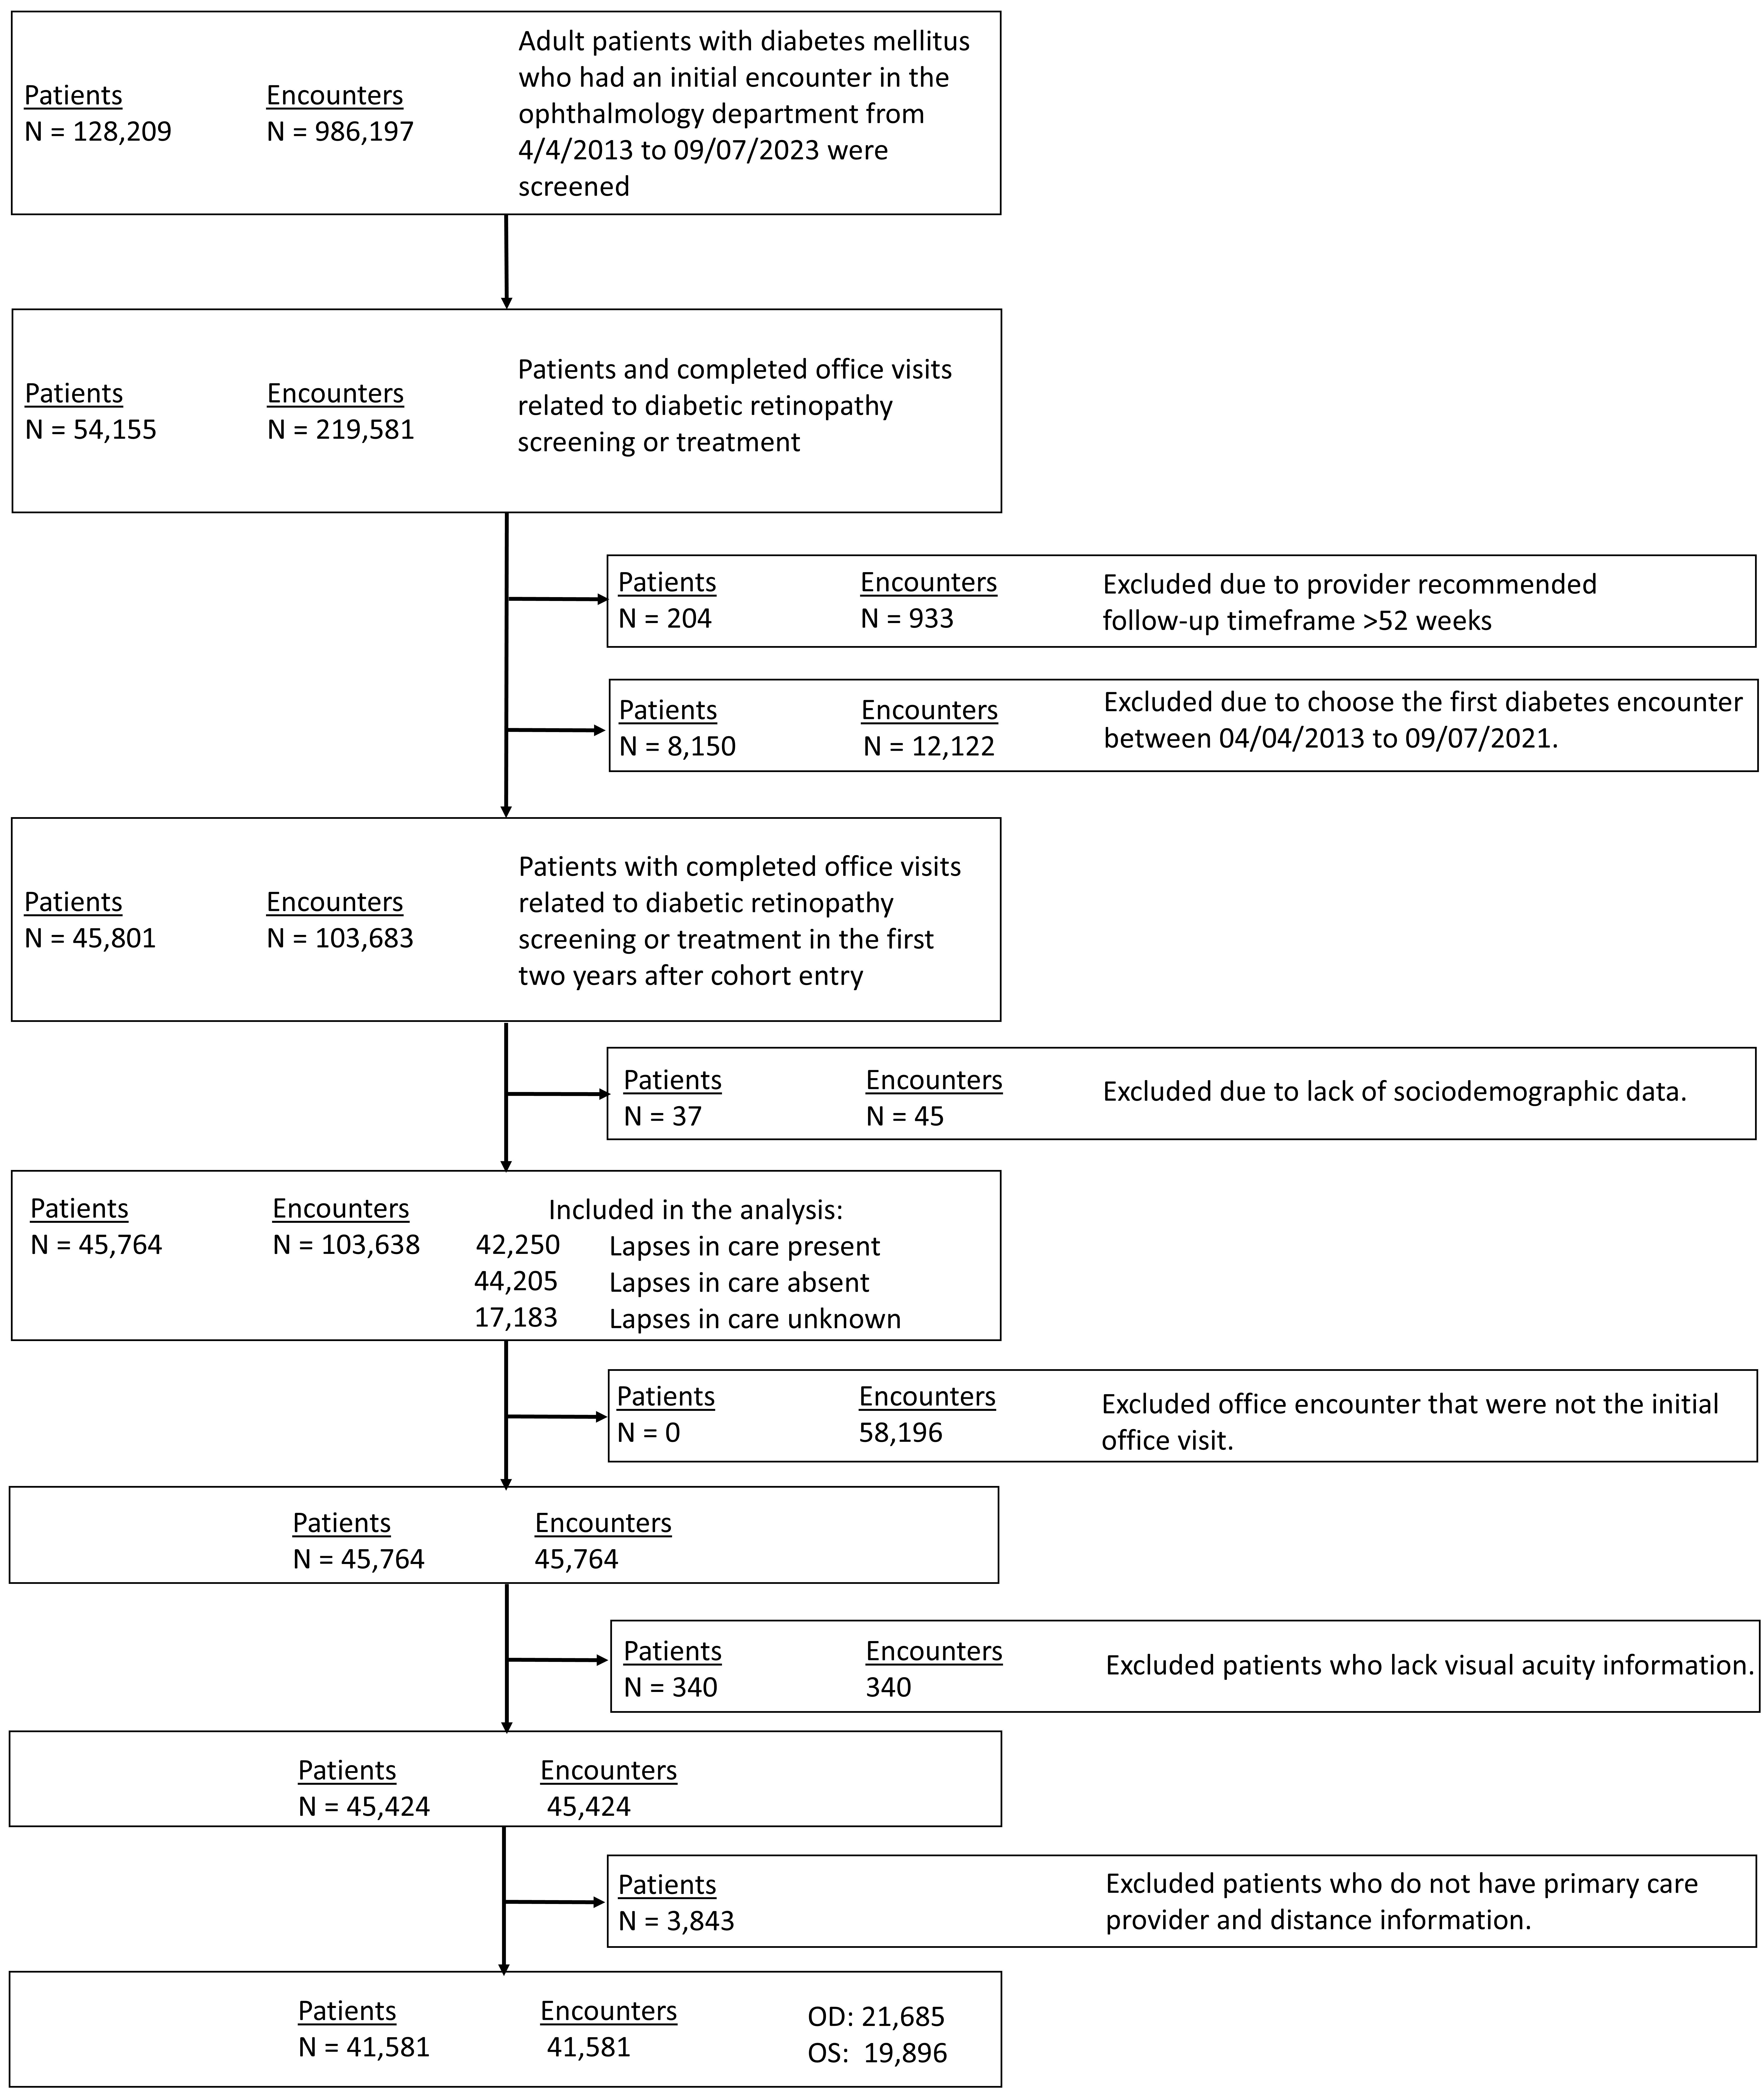


**Supplemental Table 1:** Predicted probabilities of visual acuity (VA, in logMAR), vision impairment (VA worse than or equal to 20/40) and blindness (VA worse than or equal to 20/200) at initial presentation in the worse-seeing eye for patients with internal versus external primary care providers (PCPs), stratified by the distance the patient lives from the Johns Hopkins health system. Pairwise comparisons include odds ratios, 95% confidence intervals, and *P*-values for each outcome.

| **Outcome** | **Distance** | **Predicted Probability*** | **Predicted Probability*** | **Odds Ratio (95% Confidence Interval)** | **P-value** |
| --- | --- | --- | --- | --- | --- |
|  |  | External PCP | Internal PCP |  |  |
| Vision Impairment a | ≤7.6 miles | 0.35 | 0.27 | 1.53 (1.40-1.66) | <0.001 |
|  | >7.6 miles | 0.41 | 0.31 | 1.61 (1.48-1.75) | <0.001 |
| Blindness b | ≤7.6 miles | 0.09 | 0.05 | 1.93 (1.64-2.27) | <0.001 |
|  | >7.6 miles | 0.13 | 0.08 | 1.96 (1.49-1.91) | <0.001 |
| Visual Acuity (in LogMAR) | ≤7.6 miles | 0.37 | 0.25 | 1.12c (1.10-1.15) | <0.001 |
|  | >7.6 miles | 0.47 | 0.31 | 1.17c (1.14-1.19) | <0.001 |
| Severity of DR d |  |  |  |  |  |
| No DR | ≤7.6 miles | 0.74 | 0.85 | 2.41 (2.16-2.68) | <0.001 |
|  | >7.6 miles | 0.68 | 0.81 | 2.38 (2.16-2.63) | <0.001 |
| Unspecified DR | ≤7.6 miles | 0.04 | 0.03 | 2.46 (2.20-2.76) | <0.001 |
|  | >7.6 miles | 0.05 | 0.03 | 2.35 (2.12-2.60) | <0.001 |
| NPDR | ≤7.6 miles | 0.14 | 0.09 | 3.24 (2.66-3.94) | <0.001 |
|  | >7.6 miles | 0.16 | 0.11 | 2.78 (2.44-3.17) | <0.001 |
| PDR | ≤7.6 miles | 0.08 | 0.03 | // | // |
|  | >7.6 miles | 0.11 | 0.05 | // | // |

Abbreviations: DR– diabetic retinopathy; NPDR– non-proliferative diabetic retinopathy; PDR – proliferative diabetic retinopathy

*Predicted probabilities were derived from the fitted model using marginal estimates, and P values, Odds Ratio (95% Confidence Interval) reflect pairwise comparisons of these predicted probabilities between groups using post-estimation contrasts with Bonferroni correction for multiple comparisons.

a Defined as worse than or equal to 20/40

b Defined as worse than or equal to 20/200

c Value represents a coefficient (not an odds ratio)

d Odds ratios for DR severity reflects odds of having more severe DR compared with the given level. I.e. for No DR, odds ratio reflects odds of having any level of DR compared with no DR

// Not applicable
